# Supplementary material for: Functionalization of nano-emulsions with an amino-silica shell at the oil–water interface
Source: Royal Society of Chemistry journal article supplement (doi:10.1039/c5ra12676b), 2015-01-01
Supplement: c5ra12676b1.pdf [file c5ra12676b1.pdf]

## Supplementary information

---

# Functionalization of nano-emulsions with amino-silica shell at the oil-water interface

Mohamed F. Attia,<sup>a,b,c</sup> Nicolas Anton,<sup>a,b,\*</sup> Redouane Bouchaala,<sup>a,d,e</sup>

Pascal Didier,<sup>a,d</sup> Youri Arntz,<sup>a,d</sup> Nadia Messaddeq,<sup>f</sup> Andrey S. Klymchenko,<sup>a,d</sup>

Yves Mély<sup>a,d</sup> and Thierry F. Vandamme<sup>a,b</sup>

<sup>a</sup> University of Strasbourg, Faculty of Pharmacy, 74 route du Rhin, 67401 Illkirch Cedex, France.

<sup>b</sup> CNRS UMR 7199, Laboratoire de Conception et Application de Molécules Bioactives, Pharmacie Biogalénique, 74 route du Rhin, 67401 Illkirch Cedex, France.

<sup>c</sup> National Research Center, P.O. 12622, Cairo, Egypt.

<sup>d</sup> CNRS UMR 7213, Laboratoire de Biophotonique et Pharmacologie, 74 route du Rhin, 67401 Illkirch Cedex, France.

<sup>e</sup> Laboratory of Photonic Systems and Nonlinear Optics, Institute of optics and fine mechanics, University of Setif 1, 19000 Algeria.

<sup>f</sup> IGBMC (Institut de Génétique et de Biologie Moléculaire et Cellulaire), Inserm U964, CNRS UMR7104, Université de Strasbourg, 1 rue Laurent Fries, 67404 Illkirch, France.

\* Corresponding author: Dr. Nicolas Anton, University of Strasbourg, CNRS 7199, Laboratoire de Conception et Application de Molécules Bioactives, équipe de Pharmacie Biogalénique, route du Rhin No.74, F-67401 Illkirch Cedex, France. Tel.: + 33 3 68 85 42 51, Fax: + 33 3 68 85 43 06; E-mail address: nanton@unistra.fr

### **1. Stability of nano-emulsions in serum (FBS)**

Longitudinal size measurements were carried out in serum (FBS), as a function of the incubation time, for different dilutions (1/10, 1/100 and 1/1000), in order to investigate their stability. The data reported in Fig. S1.

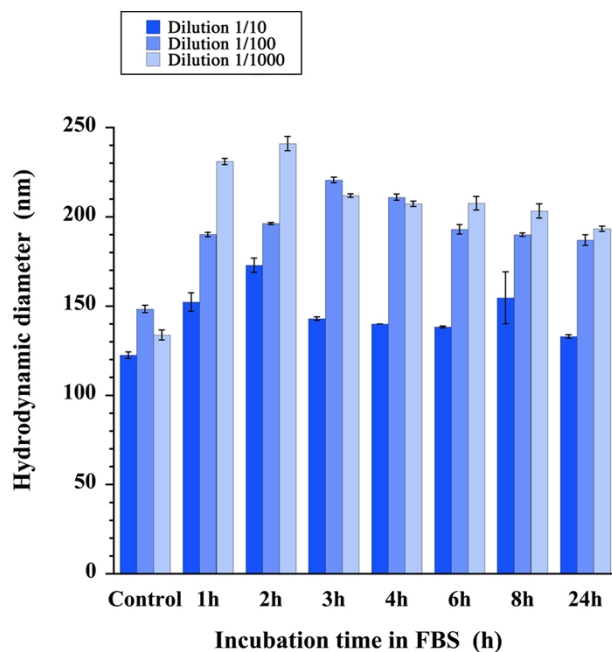

**Figure S1:** Stability of nano-emulsions in serum (FBS). The sizes of the droplets were determined by DLS for nanocapsules with  $[APTES]_{oil} = 0.5$  M, at different dilutions ( $n = 3$ ).

## ***2. Quantification of $NH_2$ available onto the nanocapsule surface by the fluorescamine method***

This section presents how the  $\text{NH}_2$  quantification method using fluorescamine has been worked out. First, we used a model amine soluble in water, ethanolamine, in a given range of concentrations, to find the amounts of fluorescamine necessary to react with all the species.

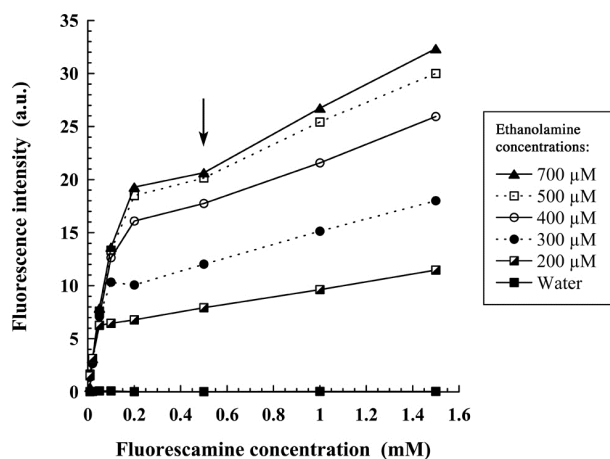

**Figure S2:** Determination of the fluorescamine concentrations necessary to saturate all  $\text{NH}_2$  groups present in solution (see details in the text).

In Fig. S2, the ethanolamine concentrations were varied from 0 to 700  $\mu\text{M}$ , and we measured the fluorescence intensities in the presence of increasing concentrations of fluorescamine. The curves show two distinct regions: (i) a sudden increase of the fluorescence for the lower fluorescamine concentrations, likely indicating that fluorescamine does not saturate the  $\text{NH}_2$  sites, and (ii) a second region where fluorescence stabilizes, indicating that fluorescamine saturates all sites. We can note that fluorescence intensity is still slightly increasing in this second region, likely due to the fact that fluorescamine molecules do not actually saturate all  $\text{NH}_2$ , and these unreacted sites are gradually accessed as fluorescamine concentration increase. However if we set the fluorescamine concentration this point will not interfere in the quantification. In addition, above an ethanolamine concentration equal to 500  $\mu\text{M}$ , saturation region is reached.

Finally, if we chose  $[\text{fluorescamine}] = 500 \mu\text{M}$  inside the fluorescamine excess region (shown by an arrow in Fig. S1), the linearity region is found for ethanolamine in the range  $[0 ; 500 \mu\text{M}]$ . The corresponding calibration curve, for  $[\text{fluorescamine}] = 500 \mu\text{M}$  is thus reported in Fig. S3.

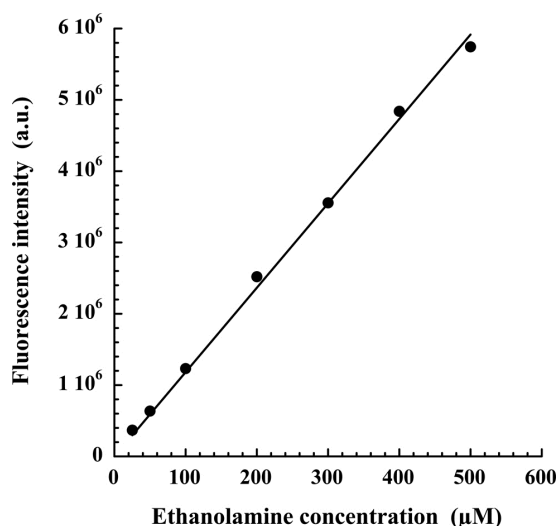

**Figure S3:** Calibration curve for the determination of the  $\text{NH}_2$  concentrations in solution (made up with ethanolamine), at a fixed fluorescamine concentration of 500  $\mu\text{M}$ .

### 3. Complementary results on the quantification of available $\text{NH}_2$ groups on the nanocapsule surface by the fluorescamine method

Fig. 5 in the main text describes the numbers of  $\text{NH}_2$  groups that has reacted with fluorescamine per nanocapsule. Comparison of these numbers with the total numbers of  $\text{NH}_2$  functions that were introduced in the formulations indicates that about half of the amines are still entrapped within the droplets (Fig. S4).

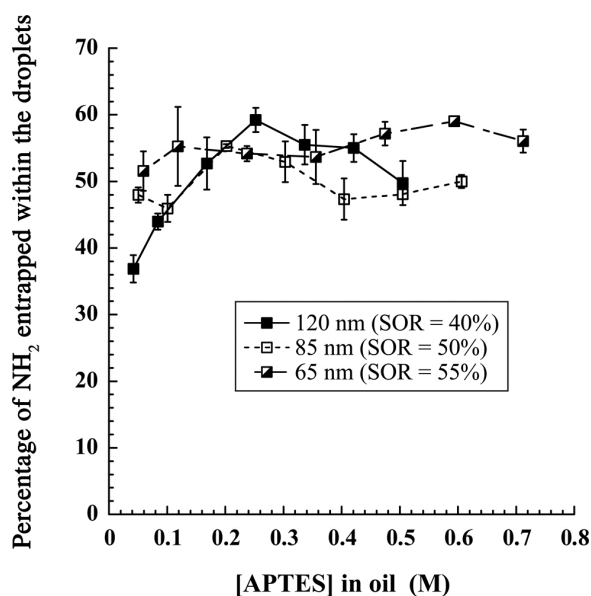

**Figure S4:** Proportion of  $\text{NH}_2$  groups that have not reacted with fluorescamine, and that are thus, entrapped into the nano-emulsion core or within the nano-capsule surface.

#### 4. Excitation and absorption spectra of coumarin blue grafted onto the surface of nanocapsules.

In addition to the emission spectra showing a red-shift of coumarin blue, once it is grafted onto the surface of nano-emulsion droplets, we report in Fig. S5 its absorption and excitation spectra.

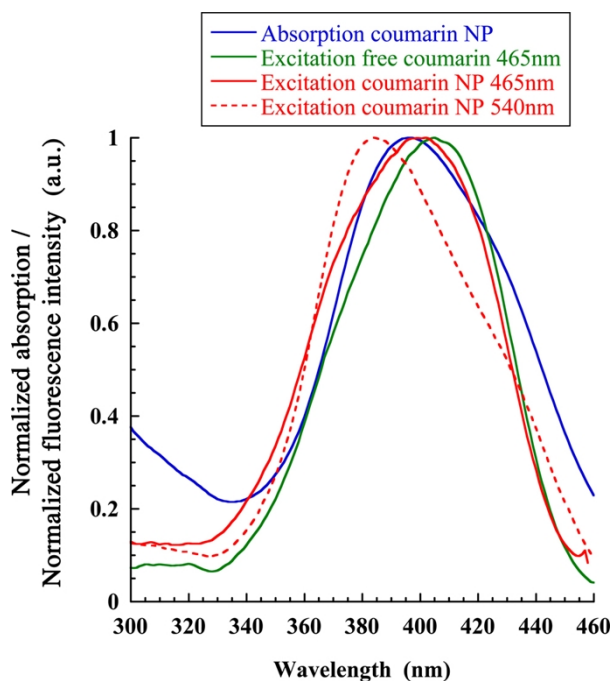

**Figure S5:** Absorption spectra of coumarin dye grafted onto the nano-emulsion droplets (blue) compared to the excitation spectra of free coumarin (green) and to the excitation spectra of coumarin grafted onto nanoparticles (red).

Excitation spectrum at 465 nm corresponds to free or unreacted dyes, and fit relatively well with the absorption spectrum of the free dye, as expected. On the other hand, the excitation spectrum at 540 nm corresponds to the grafted dyes. Its slightly spread profile and blue-shifted maximum can be explained by an aggregation-like state at the droplet surface.
